# Supplementary material
Source: HighWire-hosted journal article supplement (doi:10.1101/rna.080103.124)
Supplement: Supplemental_Figure_Legends.docx [file Supplemental_Figure_Legends.docx]

**Supplemental Figure Legends**

**Figure S1: Purification, single-particle cryoEM workflow, and *in silico* processing of the *C. elegans* ribosome**

(A) Sucrose gradient trace of *C. elegans* ribosomes. The indicated 80S fraction was harvested and purified for cryoEM grids (see Methods). (B) Micrograph of *C. elegans* ribosomes, picked particles indicated with red dots. (C) Top-2D classes obtained after pre-processing (motion and CTF-corrected) and blob picking. (D) Overview of the processing pipeline. Particles, description, and resolution are at the nodes, and arrows indicate the cryoSPARC jobs used to generate them. “CHX” is cycloheximide. (E) *Fourier* Shell Correlation, representing the overall gold standard (FSC0.143) resolution. (F) Phylogenetic tree made from 28S rRNAs, with branch lengths scaled by substitutions per position. Bolded organisms contain a high-resolution ribosome structure. Phylogenetic tree made with CLUSTAL Omega.

**Figure S2: Local resolution estimation of the reconstructed cryoEM map**

Local resolution of the *C. elegans* ribosome map derived from 98,135 particles in the range between 2.5 - 3.5 Å.

**Figure S3: Segmented map of the *C. elegans* ribosome**

*C. elegans* ribosome map colored according to model features, labeled to indicate the positions of ribosomal proteins and tRNAs. Three ribosomal proteins (uL16, eL39, and eL32) are present in the model but are not visible because they are buried.

**Figure S4: Expansion segment 7L**

Expansion segment 7L (ES7L) from *D. melanogaster* (A) and *C. elegans* (B). Shaded regions in (B) were not well-represented in the map and were thus not present in the model; for these regions a secondary structure is proposed based on unafold [(Markham and Zuker 2008)](https://paperpile.com/c/TxBPtb/fwUzY). Structures made with R2DT via RNACentral [(Sweeney et al. 2021; RNAcentral Consortium 2021)](https://paperpile.com/c/TxBPtb/Cf3v2+r1KUK). The A, B, C, D, and E arms of ES7L are indicated in blue. In *C. elegans* the C, D, and E arms appear to be replaced with a single, short hairpin, labeled “C” here.

**Figure S5: Conservation and divergence of ribosomal features in *C. elegans***

(A) uL4 from *C. elegans* (left, red) and *D. melanogaster* (purple, middle). The C-terminus of each is circled in a dotted line. Right shows the superposition of uL4 C-termini from *C. elegans* and *D. melanogaster* as they bind to ES7L. Note that *C. elegans* contains substantially reduced C, D, and E arms of ES7L. (B) As in (A), but for eL6. N-termini of both proteins indicated, and the right shows both proteins at their binding site in ES7L. (C) eL14 from *C. elegans* and *D. melanogaster*, highlighting divergent C-termini. Right shows both proteins at their binding site in ES39L rRNA–note that *C. elegans*’ rRNA (orange) has a reduced bulge compared to *D. melanogaster* (light purple). (D) eL29 from the indicated species. Top left shows all three structures superimposed. Note divergence in C-termini.

**Figure S6: Gain of an N-terminal helix in *C. elegans*’ uL5**

Top left shows superposition of uL5 from the indicated species, with positions of the N- and C-termini indicated.

**Figure S7: Conservation of ribosome features**

(A) 18S rRNA mRNA-binding cleft in *H. sapiens* (blue), *D. melanogaster* (pink), and *C. elegans* (yellow). The mRNA-binding cleft was defined by selecting all residues within a 20 Å radius of the mRNA. The 40S head is shown at the top, accounting for the more variable 3D-alignment in that part of the image. Right shows the RMSD for the area shown. (B) Similarity of uL4 and uL22, two peptide tunnel ribosomal proteins near the PTC in human (blue), fly (purple), and *C. elegans* (red). RMSD shown at right. (C) Same for the peptide exit tunnel. (D) Same for eL22, which associates with nascent chain machinery. (E) Same for the mRNA exit tunnel.

**Figure S8: Similarity between tRNAs from cycloheximide-bound ribosomes from *C. elegans* and *N. crassa***

tRNAs in the A- and P-site from the indicated cycloheximide-bound ribosomes are shown. RMSD is < 1.0 Å, (0.9 Å and 0.8 Å) for the P- and A-site tRNAs, respectively.

**Figure S9: The L1 and P stalks are not rigid in *C. elegans* cycloheximide-bound ribosomes**

(A) Single-particle cryoEM map for State 2 is shown at a high (red, 0.11) and low (blue, 0.05) observed threshold in UCSF Chimera-X, with regions of focus in (B) (dotted box) and (C) (dashed box) shown.

**Figure S10: Paralog assignment**

(A)-(H) Density at sites that diverge between paralogs. For each site, the residue under consideration is highlighted in red, with a typical map density used in model building shown. The map is colored by the local resolution, with key in the top right. The identity of the residue for each paralog is indicated in the bottom right. For (G) and (H), the left panel shows the residue at a typical density used for building (0.11), and the right panel shows density at a lower threshold (0.05 - UCSF Chimera-X).

**Figure S11: uL23 Paralog Swap**

Depiction of uL23 Paralog Swap strategy. X-chromosome uL23 paralog (*rpl-23A.1*) in orange on top; chromosome I uL23 paralog (*rpl-23A.2*) in blue in middle. Novel *rpl-23A.2* locus shown at bottom contains coding sequence of *rpl-23A.1* and noncoding sequences of *rpl-23A.2* in an attempt to produce RPL-23A.1 protein under the *rpl-23A.2* expression pattern.
